# Supplementary material for: Conessine Interferes with Oxidative Stress-Induced C2C12 Myoblast Cell Death through Inhibition of Autophagic Flux
Source: PubMed Central journal article supplement (PMC4892631; doi:10.1371/journal.pone.0157096), 2016-06-03
Supplement: pone.0157096.s001.pdf [file pone.0157096.s001.pdf]

## Supporting Information

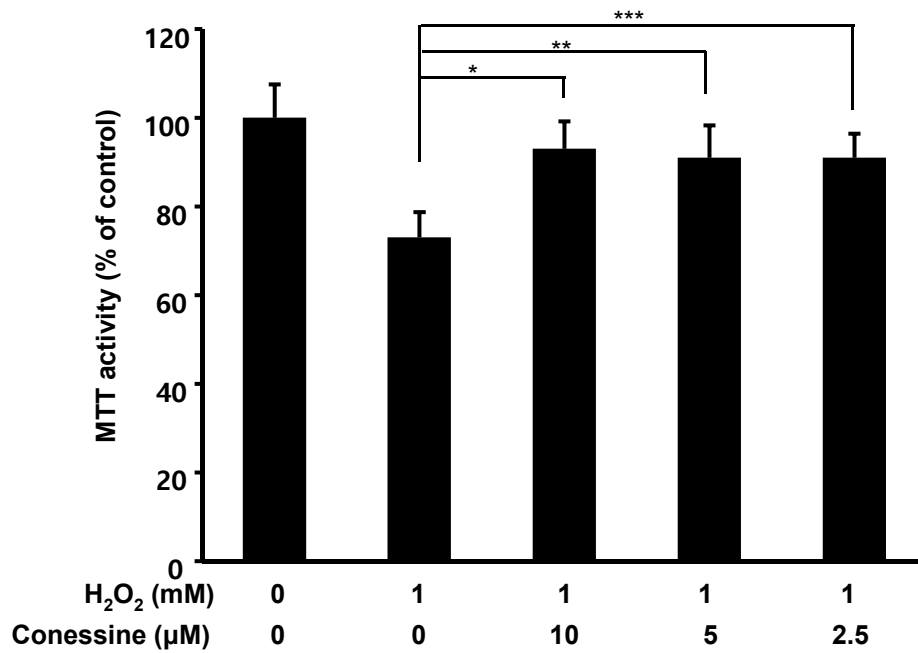

**S1-Fig. Conessine treatment protects NIH3T3 fibroblast cells from H<sub>2</sub>O<sub>2</sub>-induced cell death.** NIH3T3 cells were treated with the indicated concentration of conessine, followed by H<sub>2</sub>O<sub>2</sub> treatment (1 mM) for 24 h. Relative cell viability was measured by MTT assay. Control versus conessine treatment, \*  $P < 0.05$ ; \*\*  $P < 0.001$ ; \*\*\*  $P < 0.0001$ .
